1 Title

2 **The influence of climate factors on COVID-19 transmission**  
3 **in Malaysia: An autoregressive integrated moving average**  
4 **(ARIMA) model**

5 **Authors**

6 Cho Naing<sup>1,2\*</sup>, Han Ni<sup>3¶</sup>, Htar Htar Aung<sup>1¶</sup>, Elaine Chan<sup>1</sup>, Joon Wah Mak<sup>1</sup>

7 **Affiliations**

8 1. International Medical University, Kuala Lumpur, Malaysia

9 2. Faculty of Tropical Health and Medicine, James Cook University, Queensland, Australia

10 3. SEGi University, Sibu Clinical Campus, Sarawak, Malaysia

11

12 \*Corresponding author: Email: [cho3699@gmail.com](mailto:cho3699@gmail.com) (CN)

13 ¶These authors contributed equally to this work.

14

15

16

17

18

19

20

21

## 22 **Abstract**

### 23 **Background**

24

25 A unique concern pertaining to the spread of COVID-19 across countries is the asymmetry of  
26 risk and the irrational fear of a new pandemic and its possible serious consequences. This study  
27 aimed to perform a time series analysis on the association between climate factors and daily  
28 cases of COVID-19 in Malaysia up to 15 July 2020. The second objective was to predict daily  
29 new cases using a forecasting technique. To address within-country variations, the analysis was  
30 extended to the state level with Sarawak state as an example.

### 31 **Methodology/Principal Findings**

32

33 Datasets on the daily confirmed cases and climate variables in Malaysia and Sarawak state were  
34 obtained from publicly accessible official websites. A descriptive analysis was performed to  
35 characterize all the important variables over the study period. An autoregressive integrated  
36 moving average (ARIMA) model was introduced using daily cases as the dependent variable and  
37 climate parameters as the explanatory variables.

38 For Malaysia, the findings suggest that, *ceteris paribus*, the number of COVID-19 cases  
39 decreased with increasing average temperature ( $p=0.003$ ) or wind speed ( $p=0.029$ ). However,  
40 none of the climate parameters showed a significant relationship with the number of COVID-19  
41 cases in Sarawak state. Forecasts from the ARIMA models showed that new daily COVID-19  
42 cases had already reached the outbreak level and a decreasing trend in both settings. Holding

43 other parameters constant, a small number of new cases (approximately a single digit) is a  
44 probable second wave in Sarawak state,

## 45 **Conclusions/Significance**

46  
47 The findings suggest that climate parameters and forecasts are helpful for reducing the  
48 uncertainty in the severity of future COVID-19 transmission. A highlight is that forecasts will be  
49 a useful tool for making decisions and taking the appropriate interventions to contain the spread  
50 of the virus in the community.

51

52

53

54

55

56

57

58

59

60

61

62

63

64

65

66

67

## 68 **Introduction**

69 As of 15 June 2020, 7,823,291 confirmed cases and 431,541 deaths from the novel coronavirus  
70 disease (COVID-19) have been reported from the WHO's six regions [1]. In Malaysia, the first  
71 sporadic case was detected on 24th January 2020, and as of 16 July 2020, 8,739 confirmed cases  
72 and 122 deaths have been reported [2]. A unique concern across countries is the asymmetry of  
73 risk and the irrational fear of a new pandemic with its possible catastrophic consequences, as  
74 documented with the 1918 Spanish flu that killed an estimated 50 million people worldwide. To  
75 reduce uncertainty, governments need to accurately forecast the spread of confirmed cases.  
76 According to current evidence, the COVID-19 virus ((severe acute respiratory syndrome  
77 coronavirus 2 (SARS-CoV-2)) is primarily transmitted among people through respiratory  
78 droplets and contact routes [3]. As such, climate factors such as temperature and/or relative  
79 humidity may influence the transmission of coronavirus [4]- by affecting its survival. Previously,  
80 studies have documented the relationship between weather parameters and severe acute  
81 respiratory coronavirus (SARS-CoV) and Middle East respiratory syndrome coronavirus  
82 (MERS-CoV).

83 Time series studies are most relevant when data have been accumulated over a  
84 considerably long period of time. A common challenge to time series methodology is the  
85 availability of data. We were able to identify the weather parameters and daily COVID-19 cases  
86 at the country level instead of the weekly, monthly or annual aggregates. This finer temporal  
87 resolution will allow us to further characterize short-period variations. Despite the sustained

88 transmission of COVID-19 cases, the effects of climate factors on the population risk of COVID-  
89 19 in Malaysia have not yet been assessed in detail.

90 Hence, two research questions arise: “*Is there a role of climate parameters on the*  
91 *possible viral spread in Malaysia?*” and “*what is a forecast of regional transmission of new*  
92 *cases?*”. Taken together, the objective of the present study was to perform a time series analysis  
93 on the association between climate factors and daily cases of COVID-19 in Malaysia between  
94 January 2020 and 15 July 2020. The second objective was to predict daily new cases using a  
95 forecasting technique. Further, to address within-country variations, we extend our analysis to  
96 the state level with Sarawak state as an example.

97 We anticipate that our findings will be useful not only for policymakers in Malaysia  
98 but also for countries that will experience inclement weather conditions in 2020 to prepare the  
99 necessary public health response for the potential spread of COVID-19.

100

## 101 **Materials and Methods**

102 We performed the present study following a prior protocol. A description of the protocol is  
103 available from the corresponding author on request.

### 104 **Study area**

105 Malaysia is located between 2° and 7° N, bordering Thailand to the north and Singapore to the  
106 south. Sarawak state (1.5533°N, 110.3592°E) is an administrative region of Malaysia located on  
107 Borneo Island.

### 108 **Data collection**

#### 109 **COVID-19 incidence**

110 Publicly accessible datasets of the daily confirmed cases and deaths in Malaysia were obtained  
111 from the official website of the Malaysian Ministry of Health (MOH). These data were cross-  
112 checked with the John Hopkins University Coronavirus Resource Center Repository  
113 (<https://data.humdata.org/dataset/novel-coronavirus-2019-ncov-cases>) up to 15th July 2020

114 These data originated from the active and passive case surveillance system in Malaysia.  
115 We extracted the total daily counts of confirmed cases up to 15th July 2020. The first COVID-19  
116 case was announced in China in late December 2019, and the first case in Malaysia was  
117 announced on 23<sup>rd</sup> January 2020. This finding implies that COVID-19 had spread to Malaysia  
118 within one month.

### 119 **Climate factors**

120 The daily mean temperature (°F), relative humidity (%), precipitation (%) and wind velocity  
121 (mph) over the study period were collected from an archive of weather data for Malaysia  
122 (<https://weatherspark.com/history/>). For the country level, we used the means of the climate  
123 parameters across the reported states.

### 124 **Statistical analysis**

125 First, a descriptive analysis was performed to characterize all the variables over the study  
126 period in Malaysia and Sarawak state. Then, we introduced an autoregressive integrated moving  
127 average (ARIMA) model, using daily cases as the dependent variable and the climate parameters  
128 as the explanatory variables.

129 A structural ARIMA model was introduced to examine the association between the  
130 number of COVID-19 cases (daily counts) and the various explanatory variables (i.e., the mean  
131 temperature, wind speed, precipitation and relative humidity). We computed various  
132 permutations of the order of the autoregressive (AR), order of integration (I) and order of moving

133 average (MA) terms and chose the optimal combination of parameters using the mean squared  
134 error. The correlograms were visualized to help in determining the orders of the MA and AR  
135 terms to include in the model. Before modeling the daily confirmed cases, we checked the  
136 stationarity of the data series by the augmented Dickey-Fuller (ADF) test [5]. A model was first  
137 applied to quantify the aggregate country-level associations between the climate variables and  
138 the daily cases of COVID-19. Another model was applied to quantify the state-specific  
139 association for Sarawak state, Malaysia.

140 We applied the *auto.arima(1,1,0)* function to forecast new cases. The best order of an  
141 ARIMA process was determined through a unit root test to identify the appropriate degree of  
142 differencing and by the minimization of the corrected Akaike information criterion (AIC) [5].  
143 We then conducted fourteen-day-ahead point forecasts and calculated the prediction intervals,  
144 taking into account the incubation period. Two analytical models were introduced depending on  
145 the situation of COVID-19 in Malaysia in general and Sarawak state in particular.

146 The forecast accuracy was checked with four accuracy measures: the mean absolute error  
147 (MAE), mean absolute percentage error (MAPE), mean absolute scaled error (MASE), and root  
148 mean square error (RMSE) [6]. We performed the Ljung-Box test, for which a p-value greater  
149 than 0.05 means that the residuals for the current time series model are independent [5].

150 The basic ARIMA forecasting estimated equation is

151 
$$\Delta \hat{y}_t = \lambda_1 \Delta y_{t-1} + \dots + \lambda_p \Delta y_{t-p} + \psi_1 \Delta e_{t-1} + \dots + \psi_q \Delta e_{t-q} + e_t \dots \dots \dots (1)$$

152 where

153  $\Delta$  = degree of nonseasonal differences,

154  $\hat{Y}$  = time series that will be predicted at time t,

155 P = lag order of AR,

156  $\Lambda$ =the coefficient of each parameter,

157  $Q$ =lag order of MA,

158  $\Psi$ =coefficient of each parameter  $q$ , and

159  $et$ =the residuals of the errors at time  $t$ .

160 STATA 16.1 (StataCorp, Texas, USA) was used to calculate the descriptive statistics, and

161 the “*Forecast*” package in *R* (R Core team) was used to forecast the confirmed COVID-19 cases.

## 162 **Results**

163 Table 1 presents the characteristics of the variables for Malaysia and Sarawak state.

164 Table 1. Characteristics of the weather variables and new reported cases

| Malaysia from 13 March 2020-15 July 2020                 |             |                 |
|----------------------------------------------------------|-------------|-----------------|
| Variable                                                 | Mean (SD)   | Minimum-maximum |
| Temperature (°F)                                         | 89.6 (0.57) | 88-90           |
| Precipitation (%)                                        | 6.15 (0.21) | 5.9-6.6         |
| Humidity (%)                                             | 99.5 (0.8)  | 98- 100         |
| Wind speed (mph)                                         | 5.3 (0.8)   | 4.1-7.3         |
| Cases                                                    | 50 (62)     | 0-277           |
| Deaths                                                   | 1 (1.5)     | 0-9             |
| Sarawak state, Malaysia, from 13 March 2020-15 July 2020 |             |                 |
| Description                                              | Mean (SD)   | Minimum-maximum |
| Temperature (°F)                                         | 88.0 (1.01) | 86-89           |



|                   |            |         |
|-------------------|------------|---------|
| Precipitation (%) | 5.7 (0.16) | 5.5-6   |
| Humidity (%)      | 100 (0)    | 100-100 |
| Wind speed (mph)  | 3.3 (0.2)  | 2.9-3.6 |
| Cases             | 5 (6)      | 0-32    |

165  
166 During the period from 24<sup>th</sup> January 2020 to 15<sup>th</sup> July 2020, the mean daily cases in Malaysia  
167 was 55, while the highest daily cases of 277 was recorded on 6<sup>th</sup> April 2020. During the period  
168 from 13<sup>th</sup> March 2020 to 15 July 2020, the mean daily cases in Sarawak state in Malaysia was 5,  
169 while the highest daily cases of 32 was recorded on 1<sup>st</sup> April 2020. Figure 1 shows the total  
170 number of cases stratified by the states of Malaysia.

171 **Fig 1. Total number of confirmed COVID-19 cases stratified by the states of Malaysia**

172

### 173 **Relationship with climate parameters**

174 For Malaysia, the aggregate mean temperature, wind speed, precipitation and relative humidity  
175 were 89.8 °F, 5.3 mph, 6.1% and 99.4%, respectively (Table 1). The differenced daily COVID-  
176 19 cases in Malaysia over time from 24<sup>th</sup> January 2020 to 15<sup>th</sup> July 2020 are presented in Fig 2,  
177 which shows the time series data with an impression of stationary.

178 **Fig 2. Differenced daily COVID-19 cases in Malaysia from 24 January 2020 to 15 July**  
179 **2020.**

180 The estimated coefficients of the ARIMA(1,1,1) model for Malaysia are presented in Table  
181 2. Temperature (-58.99 (-97.6 to -20.4,  $p=0.003$  and wind speed (-77.03 95% CI:-221.5 to 67.5,  
182  $p=0.029$ ).

183 were significantly and inversely related to Covid-19 confirmed cases in Malaysia during the  
184 study period.

185 Table 2 Estimates of the regression coefficients of the ARIMA model for Malaysia between 24  
186 January 2020 and 15 July 2020

| Parameter         | Coefficient (95% CI)    | <i>p</i> -value |
|-------------------|-------------------------|-----------------|
| Intercept         | -1.05 (-5.7 to 3.58)    | 0.65            |
| Temperature (°F)  | -58.99 (-97.6 to -20.4) | <b>0.003</b>    |
| Precipitation (%) | 132.1 (-0.66 to 264.8)  | 0.051           |
| Humidity (%)      | 20.9 (-3.9 to 45.9)     | 0.099           |
| Wind speed (mph)  | -77.03 (-221.5 to 67.5) | <b>0.029</b>    |

187 The partial autocorrelation function (PACF) plot (S1 Fig) had a significant spike only at lag 1,  
188 reflecting that all the higher-order autocorrelations are effectively explained by the lag-1  
189 autocorrelation.

190 For Sarawak state from 13<sup>th</sup> March 2020 to 15<sup>th</sup> July 2020, we followed the same procedures  
191 performed for the model of Malaysia (S2 Fig). None of the climate variables were significantly  
192 associated with the number of confirmed COVID-19 cases (Table 3).

193 Table 3 Estimates of the regression coefficients of the ARIMA model for Sarawak state of  
194 Malaysia

| Variable          | Coefficient (95% CI)  | <i>p</i> -value |
|-------------------|-----------------------|-----------------|
| Temperature (°F)  | -0.79 (-5.9 to 4.3)   | 0.76            |
| Precipitation (%) | -0.16 (-19.0 to 18.7) | 0.99            |
| Wind speed (mph)  | -7.02 (-26.8 to 12.8) | 0.49            |
| Constant          | -0.04 (-0.37 to 0.3)  | 0.83            |

195

## 196 **Forecasting of the confirmed COVID-19 cases**

197 For Malaysia, ARIMA forecasting with the *auto.arima*(1, 1,1) function showed the best order  
198 of an ARIMA process with the appropriate degree of differencing and identification of the AR  
199 and MA parameters. This finding was also applicable to the *auto.arima*(1,1,1) model for  
200 Sarawak state. The forecast results for new daily COVID-19 cases in Malaysia and Sarawak state  
201 (prediction of 14 days) are presented in Fig 3 and Fig 4, respectively. We produced a final set of  
202 forecasts and prediction intervals using the most recent data, up until 15<sup>th</sup> July 2020. We  
203 estimated two levels of uncertainty (80% and 95% CIs). Ljung–Box tests showed that the null  
204 hypothesis of the serial independence of the residuals for the current time series models could  
205 not be rejected ( $p > 0.63$  for Malaysia,  $p > 0.87$  for Sarawak state).

206 **Fig 3 Forecasts of new daily COVID-19 cases in Malaysia (prediction of 14 days).**

207 **Fig 4 Forecasts of new daily COVID-19 cases in Sarawak state (prediction of 14 days).**

208 As seen in the figures, the spreads were characterized by a declining trend, indicating that  
209 the COVID-19 transmission has probably already reached its peak. However, the slowdown in  
210 the new COVID-19 cases seems to require shorter time for Sarawak state compared to the whole  
211 country. On the other hand, a small spike (around a single digit) was seen in Sarawak state; this  
212 finding cannot rule out the possibility of a new wave (with small intensity) if the current  
213 recommendations/standard operating procedures such as social/physical distancing, the use of face  
214 masks, and hand washing, as issued by the Malaysian MOH is not followed properly. The  
215 forecast accuracies were validated with the MAE, MAPE, MASE, and RMSE (S1 Table).

216

217

## 218 Discussion

### 219 Summary of the main results

220 The findings of this study were based on COVID-19-related data and climate parameters  
221 available for Malaysia in aggregate and Sarawak state in particular. The major observations of  
222 the current analysis are as follows:

223 1. For both Malaysia (24<sup>th</sup> January 2020 to 15<sup>th</sup> July 2020) and Sarawak state (13<sup>th</sup> March to  
224 15<sup>th</sup> July 2020), time series ARIMA models were introduced.

225 2. For Malaysia, the findings suggest that, *ceteris paribus*, as the average temperature or  
226 wind speed increased, the number of COVID-19 cases decreased.

227 3. None of the climate parameters showed a significant relationship with the number of  
228 COVID-19 cases in Sarawak state.

229 4. Forecasts from the ARIMA models showed that new daily COVID-19 cases have already  
230 reached the outbreak level, and a decreasing trend was observed in both settings. *Ceteris paribus*,  
231 a small number of new cases (approximately a single digit) would be indicative of a probable  
232 second wave in Sarawak state.

233 Our findings were supported by a study in Turkey, which also showed an inverse  
234 relationship between temperature and the number of COVID-19 cases [7].

235 A study in Singapore reported that an average maximum temperature increase of 1 °C decreased  
236 the incidence rate by -7.5% (95% CI = [-12.3; -2.6]) on the same day [8]. In the 2003. SARS  
237 epidemic, a study of Beijing and Hong Kong showed an inverse relationship between  
238 temperature and the number of cases [9]. Although an exact cause is not yet known, a possible  
239 reason may be that higher temperature influences the viability of the severe acute respiratory

240 syndrome coronavirus 2 virus [7]. A higher wind speed was significantly and positively related  
241 to the number of new COVID-19 cases reported in a study in Turkey [7], which was  
242 contradictory to the current findings in Malaysia.

243 Temperature is a fundamental factor in the human living environment that can play an  
244 important role in public health in terms of epidemic development, prevention, and control [10].  
245 Unpublished studies have also reported that low temperatures are beneficial to viral transmission  
246 [11,12].

247 Bill Gates commented on COVID-19 transmission saying that *“I hope it’s not that bad,*  
248 *but we should assume it will be until we know otherwise”* [13]. It is believable that forecasts and  
249 their associated uncertainty can and should be an integral part of the decision-making process,  
250 especially in high-risk cases [14]. In this study, univariate time series models which assume that  
251 the data are accurate and past patterns will continue to apply were used [15]. Significant,  
252 consistent forecast errors (potentially spanning outside the prediction intervals) should be  
253 associated with changes in the observed patterns and the need for additional actions and  
254 measures encountered.

255 The modeling quality is dependent on whether the assumptions are violated or not. In this  
256 study, the model’s diagnostic tests and a small percentage of error terms ensure the forecasting  
257 validity. The assumptions required for the prediction intervals of ARIMA models, such as  
258 uncorrelated and normally distributed residuals, were not violated. Moreover, the accuracy,  
259 robustness, coherency and uncertainty mitigation that the models imply have made them a  
260 popular forecasting framework, highlighting the potential benefits of multiple temporal  
261 aggregation in decision making [16]. Forecasts of deaths and hospitalizations (the number of new

262 cases in this case) will help inform public health decision making by projecting the likely impact  
263 of the COVID-19 pandemic.

## 264 **Study limitations**

265 There were limitations to the current analyses that need to be acknowledged. As the results are  
266 based on aggregate data for the country and specific to only one particular state, in light of  
267 geographic differences, the evaluation power could have been affected. Additionally, the results  
268 may have been affected by the quality of the data in relation to the accuracy of the diagnostic  
269 tests for COVID-19. Furthermore, there might be other factors (e.g., the quality of the case  
270 surveillance system) other than weather variables that can influence the transmission potential of  
271 COVID-19. Only a few weather variables were available for inclusion in the current study.

272         Nevertheless, there are strengths in the current study. The source data for COVID-19  
273 cases originated from the national database, which is identical to the John Hopkins's database,  
274 thus ensuring the accuracy of the data. The findings were, to a certain extent, comparable to  
275 those from other published studies. For instance, an inverse relationship between the average  
276 temperature and the number of new cases was in line with the findings from other countries. As  
277 we hope the presented forecasts clearly show, epidemic growth is a highly nonlinear process,  
278 where every day lost to inaction is too much [17]. On the other hand, a small spike  
279 (approximately a single digit) was seen in Sarawak state; this finding cannot rule out the  
280 possibility of new (small intensity) waves. This finding implies a potential small wave is  
281 expected in Sarawak state, if people fail to comply with the measures recommended by the  
282 Malaysian MOH such as social/physical distancing, use of face masks and hand washing. In this  
283 context, forecasts will be a useful tool for governments and individuals to make decisions and  
284 take appropriate actions to contain the spread of the virus [15].

## 285 **Conclusions**

286 The findings suggest that it is important to consider climate parameters and forecasts to reduce  
287 the uncertainty in the severity of future COVID-19 transmission. Our results highlight that  
288 forecasts will be a useful tool for making decisions and taking the appropriate interventions to  
289 contain the spread of the virus in the community.

290

291

292

293

294

295

296

297

298

299

300

301

302

303

304

305

306

## 307 **Acknowledgments**

308 We thank our institutions for allowing us to perform this study. We acknowledge Dr. Norah Htet  
309 for assisting with the earlier draft.

310

311

312

313

314

315

316

317

318

319

320

321

322

323

324

325

326



## 327 **References**

- 328 1. WHO. Coronavirus disease (COVID-19) Pandemic.2020a.
- 329 2. Malaysian Ministry of Health (MOH), 2020.
- 330 Available at <https://www.worldometers.info/coronavirus/country/malaysia/>
- 331 3. WHO. Models of transmission of virus causing COVID-19: implications for IPC
- 332 precaution recommendations. 2020b.
- 333 Available at
- 334 [https://www.who.int/news-room/commentaries/detail/modes-of-transmission-of-virus-](https://www.who.int/news-room/commentaries/detail/modes-of-transmission-of-virus-causing-covid-19-implications-for-ipc-precaution-recommendations)
- 335 [causing-covid-19-implications-for-ipc-precaution-recommendations.](https://www.who.int/news-room/commentaries/detail/modes-of-transmission-of-virus-causing-covid-19-implications-for-ipc-precaution-recommendations)
- 336
- 337 4. Casanova LM, Jeon S, RutalaWA, et al. Effects of air temperature and relative humidity
- 338 on coronavirus survival on surfaces. *Appl Environ Microbiol.* 2010; 76:2712-7.
- 339 5. Peter B, Richard D. *Introduction to Time Series and Forecasting* (2nd ed.). Springer. 2002;
- 340 35–38.
- 341 6. Hyndman RJ, Anne B K. Another look at measures of forecast accuracy. *International*
- 342 *Journal of Forecasting*, 2006; 22(4):679-688 [doi:10.1016/j.ijforecast.2006.03.001](https://doi.org/10.1016/j.ijforecast.2006.03.001).
- 343 7. Şahin M. Impact of weather on COVID-19 pandemic in Turkey. *Sci Total Environ.*
- 344 2020;728:138810.
- 345 8. Tobías A, Molina T. Is temperature reducing the transmission of COVID-19?. *Environ*
- 346 *Res.* 2020; 186:109553. doi:10.1016/j.envres.2020.109553.
- 347 9. Bi 2007 Bi P, Wang J, Hiller JE. Weather: driving force behind the transmission of severe
- 348 acute respiratory syndrome in China? *Intern Med J.* 2007;37(8):550-554.

- 349 10. Qi H, Xiao S, Shi R, Ward MP, Chen Y, Tu W, et a Su Q, Wang W, Wang X, Zhang Z.  
350 COVID-19 transmission in Mainland China is associated with temperature and humidity:  
351 A time-series analysis. *Sci Total Environ.* 2020 1;728:138778.
- 352 11. Triplett M. Evidence that higher temperatures are associated with lower incidence of  
353 COVID-19 in pandemic state, cumulative cases reported up to March 27. 2020. medRxiv  
354 preprint.
- 355 12. Wang J. High temperature and high humidity reduce the transmission of COVID-19.  
356 SSRN Electronic Journal. 2020 doi: 10.2139/ssrn.3551767.
- 357 13. Bill Gate. How to respond to COVID-19. Feb 2020. Available at  
358 <https://www.gatesnotes.com/Health/How-to-respond-to-COVID-19>.
- 359 14. Makridakis S, Kirkham R, Wakefield A, Papadaki M, Kirkham J, a Long L. Forecasting,  
360 uncertainty and risk; perspectives on clinical decision-making in preventive and curative  
361 medicine,. *International Journal of Forecasting.* 2017;35(2):659-666
- 362 15. Petropoulos 2020 Petropoulos F, Makridakis S. Forecastingthe novel coronavirus COVID-  
363 19.PLoS One.2020; 15(3):e0231236
- 364 16. Spiliotis E, Petropoulos F, Assimakopoulos V. Improving the forecasting performance of  
365 temporal hierarchies. *PLoS One.* 2019;14(10):e0223422.
- 366 17. Perc M, Miksic NG, Stozer A. Forecasting COVID-19. *Frontiers in Physics.*2020; 8:127.

367

## 368 **Supporting information**

369 S1 Fig Autocorrelation (ACF) and partial autocorrelation of COVID-19 time series data in  
370 Malaysia

371 S 2 Fig Autocorrelation (ACF) and partial autocorrelation of COVID-19 time series data in  
372 Sarawak state

373 S1 Table Accuracy measures

374

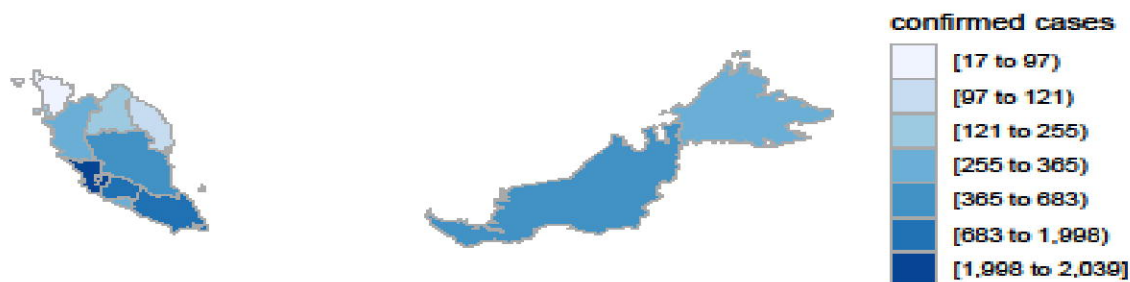

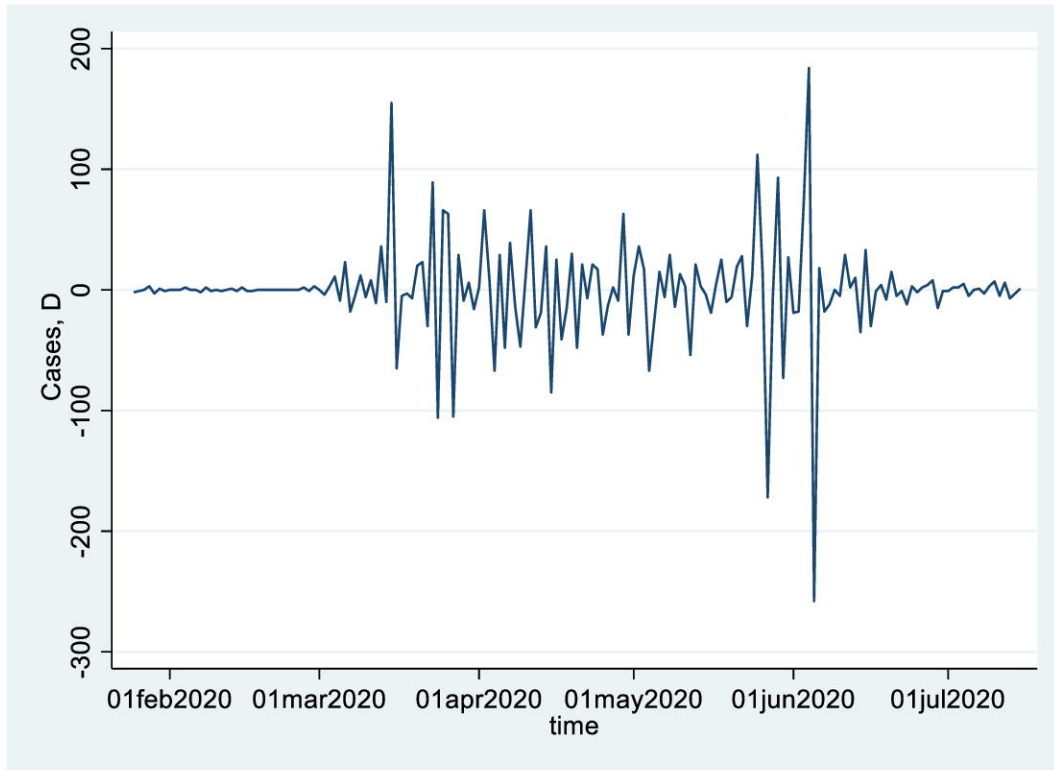

## Forecasts from ARIMA(1,1,1)

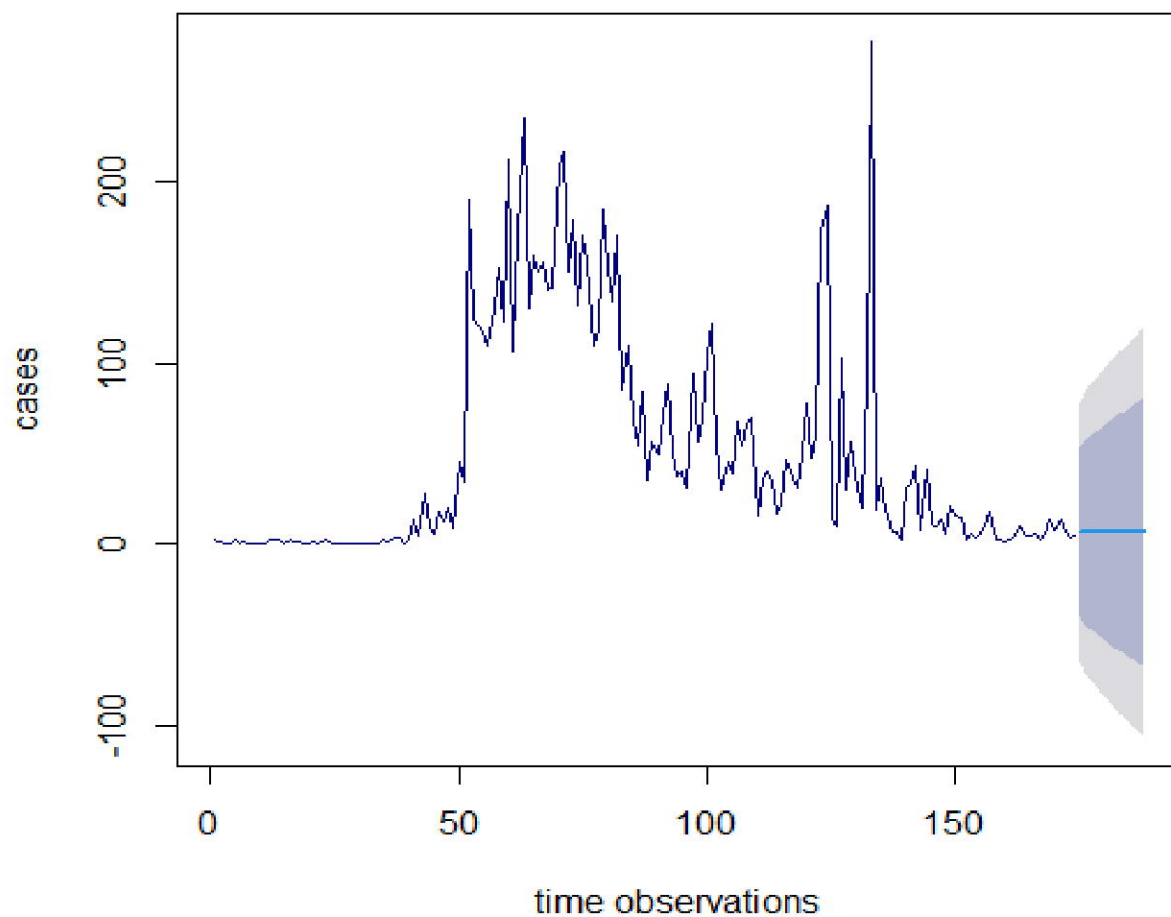

The solid navy blue line denotes the actual data, which were last updated on July 15th. From this date onward, we have the predicted values, where the solid blue line denotes the continuation of the trend from the past 14 days, i.e., if nothing changes. The dark gray boundaries denote the 95% CI, while the light gray boundaries represent the 80% CI.

## Forecasts from ARIMA(1,1,1)

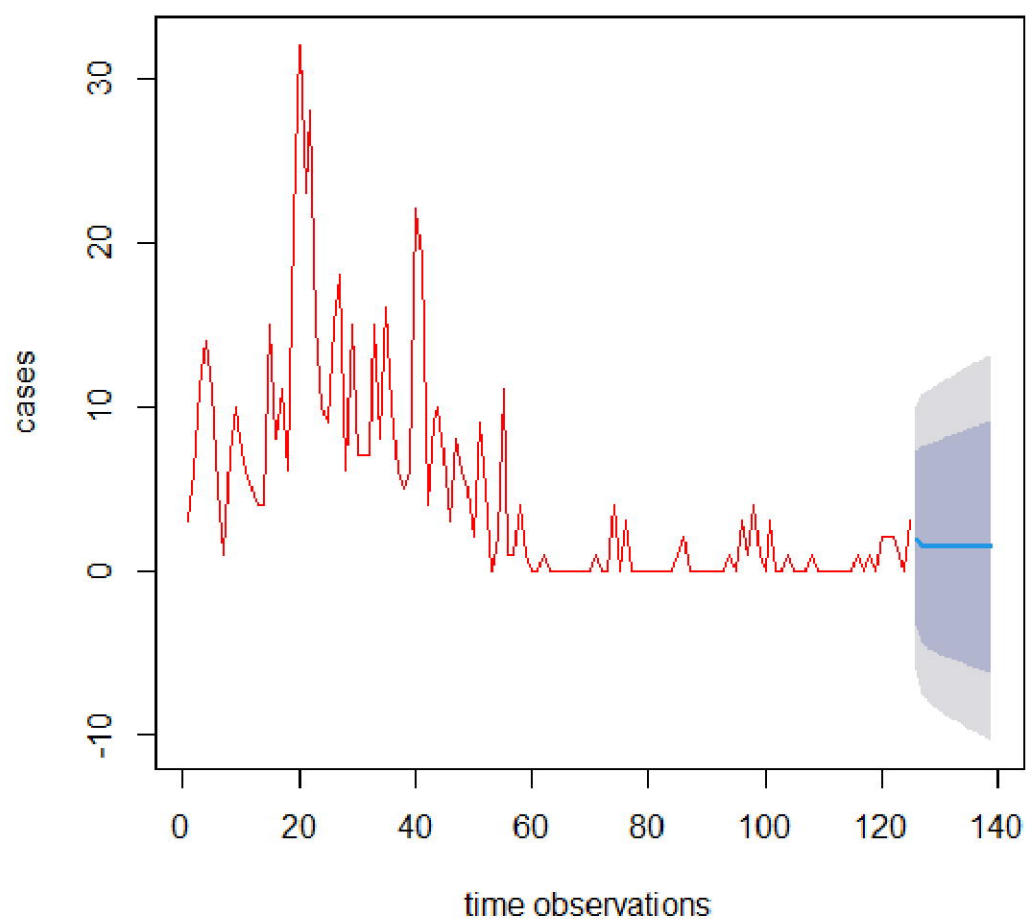

The solid red solid line denotes the actual data, which were last updated on July 15th. From this date onward, we have the predicted values, where the solid blue line denotes the continuation of the trend from the past 14 days, i.e., if nothing changes. The dark gray boundaries denote the 95% CI, while light gray boundaries represent the 80% CI.
